# Supplementary material
Source: publisher figshare collection journal article supplement (https://sage.figshare.com/ndownloader/files/17822999)
Supplement: Supplementary file 1 [file 17822999]

**Appendix B**

**Contrast Manipulation: high figure-ground contrast (top image)  
and low figure-ground contrast (bottom image) stimuli**

**HYDRATION**

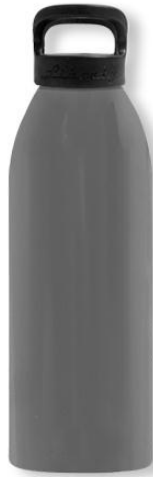

**ON THE GO**

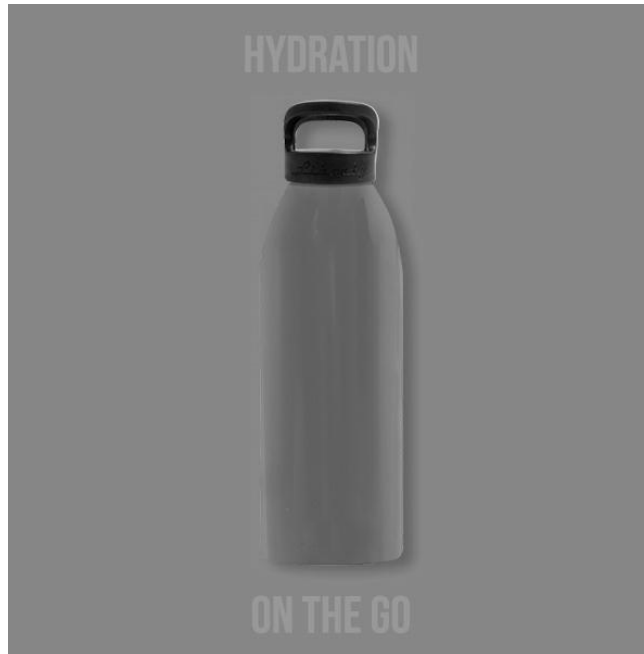

## Appendix C

### Font Manipulation: easy-to-read font (top image) and difficult-to-read-font (bottom image) stimuli

Product features:

1.2 GHz quad-core Qualcomm processor  
1 GB RAM Memory  
32GB storage memory  
Dual-Band Wi-Fi  
Bluetooth  
7" WXGA Display (1280x800 Resolution)  
Camera Resolution 5.0MP, 1080p HD Video Recording  
Free monthly access to all apps in the app store

Price: \$149.99

*Product features:*

*1.2 GHz quad-core Qualcomm processor*  
*1 GB RAM Memory*  
*32GB storage memory*  
*Dual-Band Wi-Fi*  
*Bluetooth*  
*7" WXGA Display (1280x800 Resolution)*  
*Camera Resolution 5.0MP, 1080p HD Video Recording*  
*Free monthly access to all apps in the app store*

*Price: \$149.99*

## **Appendix D**

### **Readability Manipulation: high readability (top paragraph) and low readability (bottom paragraph) stimuli**

Create the perfect office space with this Desk with Bookshelves. This desk fits nicely in a corner to maximize your home office space. The large desk top surface offers plenty of room for your monitor or laptop, as well as papers and other essential office supplies. There are two openings built into the desk to organize and manage your cords. Two open shelves on the side of the desk provide a perfect home for your binders and books but keep them within easy reach.

Fashion an impeccable workplace space with this Desk with Bookshelves. This desk positions attractively in a corner to take full advantage of your home-based workplace space. The outsized desk top surface provides sufficient room for your monitor or laptop, along with documents and other indispensable workplace materials. There are two apertures built into the desk to consolidate and manage your cables. Two unenclosed shelves on the side of the desk provide an impeccable home for your binders and books but retain them within stress-free reach.
